# Supplementary material
Source: publisher figshare collection journal article supplement (https://frontiersin.figshare.com/ndownloader/files/15517346)
Supplement: Supplementary file [file 15517346]

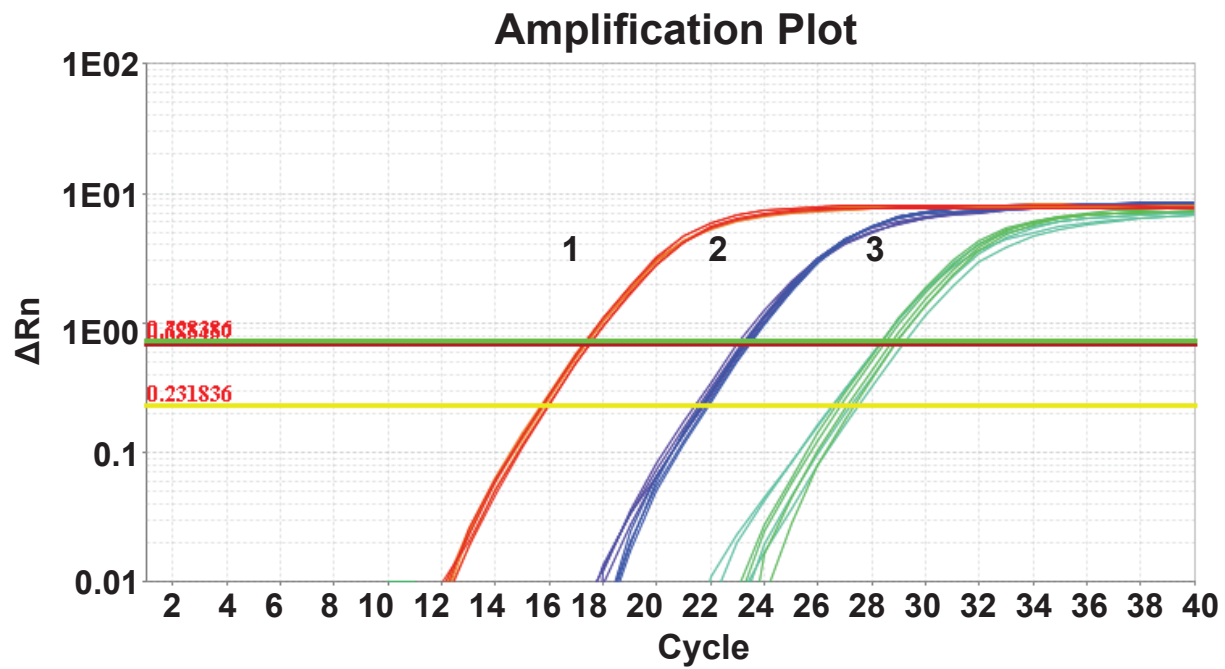

Supplemental Figure 1. Expression analysis of TG and endogenous ADCY8 normalized to HPRT in transgene and wild type mice. Amplification plot of RT-qPCR. 1-Hs. ADCY8 (human) expressed only in TG (N=3); 2-HPRT (housekeeping gene) expressed in WT(N=3) and TG (N=3); 3-Mm.ADCY8 (endogenous) expressed in WT (N=3) and TG (N=3).

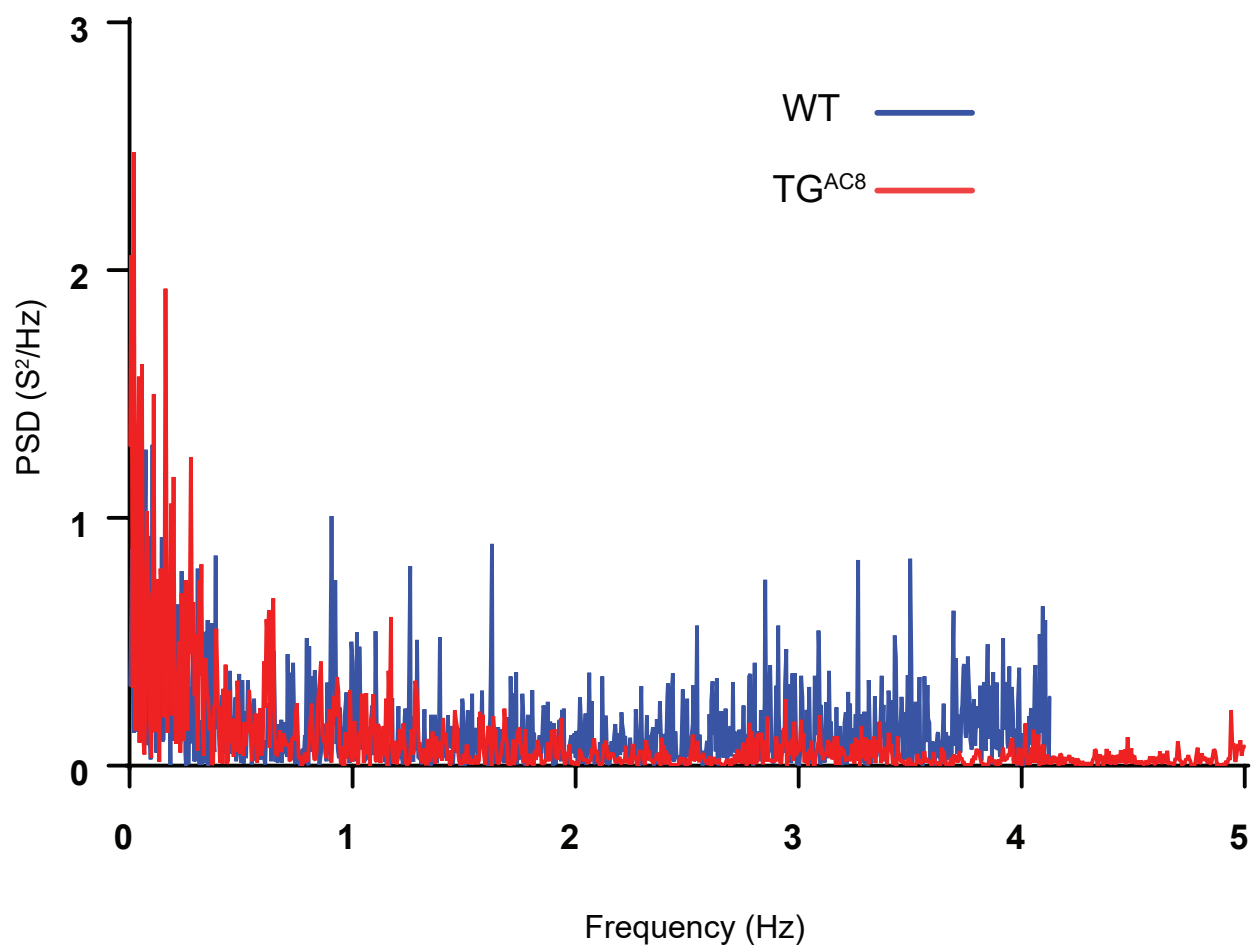

Supplemental Figure 2. Representative power spectrum plots for WT and TG<sup>AC8</sup> mice.

## Supplemental Table 1. Quantification of immunofluorescence

| Antibody | TG <sup>AC8</sup> |            |            | WT |             |           | P-value | TG <sup>AC8</sup> /WT |
|----------|-------------------|------------|------------|----|-------------|-----------|---------|-----------------------|
|          | N                 | CTCF       | STE        | N  | CTCF        | STE       |         |                       |
| hADCY8   | 7                 | 8,795,437  | 2,587,771  | 9  | 1,526,010   | 407,447   | 0.012   | 5.764                 |
| GRK5     | 8                 | 26,374,821 | 4,486,725  | 9  | 13,255,600  | 1,400,266 | 0.041   | 1.990                 |
| Arrb2    | 8                 | 1.0600     | 0.171      | 8  | 0.685       | 0.089     | 0.078   | 1.536                 |
| DAB2     | 8                 | 10,950,414 | 1,972,448  | 7  | 3,935,052   | 1,689,600 | 0.046   | 2.783                 |
| RGS6     | 9                 | 1,364,939  | 120,331    | 7  | 13,032,476  | 5,115,687 | 0.009   | 0.105                 |
| TH       | 7                 | 35,941,055 | 7,976,877  | 8  | 10,607,057  | 1,906,936 | 0.019   | 3.388                 |
| DBH      | 17                | 1.130      | 0.232      | 16 | 3.197       | 1.434     | 0.017   | 0.354                 |
| HCN4     | 30                | 1,260,319  | 29,771,697 | 30 | 1,332,994.6 | 223,775.2 | 0.366   | 0.945                 |

Supplemental Table 1. Quantification of immunolabeling of TG<sup>AC8</sup> and WT SANC. Ratio of relative abundance of TG<sup>AC8</sup> to WT is calculated in the final column.

Supplemental Table 2. HRV analyses

| Variable         |                             | Dual Autonomic Block |               |         |         |                                                                                                                                                |
|------------------|-----------------------------|----------------------|---------------|---------|---------|------------------------------------------------------------------------------------------------------------------------------------------------|
|                  |                             | WT                   | TG            | F-Value | P-value | Pairwise Interactions                                                                                                                          |
| Time Domain      | SDRR                        | 2.00 ± 0.63Θ         | 0.66 ± 0.24   | 20.546  | 0.001   | WT Basal X WT Dual Autonomic Block, WT Basal X TG Basal                                                                                        |
|                  | CV                          | 1.59 ± 0.48Θ         | 0.72 ± 0.24   | 14.007  | 0.004   | WT Basal X WT Dual Autonomic Block, WT Basal X TG Basal                                                                                        |
|                  | Mean RR ‡                   | 124.8 ± 9.13         | 91.54 ± 6.9   | 3.337   | 0.098   |                                                                                                                                                |
|                  | Min RR                      | 119.4 ± 8.42*Θ       | 89.74 ± 6.75Θ | 5.561   | 0.040   | WT Basal X WT Dual Autonomic Block, TG Basal X TG Dual Autonomic Block, WT Basal X TG Basal, WT Dual Autonomic Block X TG Dual Autonomic Block |
|                  | Max RR                      | 129.8 ± 10.10*Θ      | 93.18 ± 7.30  | 19.571  | 0.001   | WT Basal X WT Dual Autonomic Block, WT Basal X TG Basal, WT Dual Autonomic Block X TG Dual Autonomic Block                                     |
|                  | Range RR                    | 10.38 ± 3.91Θ        | 3.44 ± 1.17   | 30.224  | 0.000   | WT Basal X WT Dual Autonomic Block, WT Basal X TG Basal                                                                                        |
| Frequency Domain | VLF (ms <sup>2</sup> /Hz) ‡ | 142.71 ± 75.9        | 48.72 ± 33.6  | 0.545   | 0.477   |                                                                                                                                                |
|                  | LF (ms2/Hz)                 | 14.44 ± 5.79Θ        | 6.74 ± 4.76   | 14.416  | 0.004   | WT Basal X WT Dual Autonomic Block, WT Basal X TG Basal                                                                                        |
|                  | HF (ms2/Hz)                 | 53.71 ± 22.63Θ       | 20.58 ± 11.38 | 5.184   | 0.046   | WT Basal X WT Dual Autonomic Block, WT Basal X TG Basal                                                                                        |
|                  | Total Power (ms2/Hz) ‡      | 210.87 ± 64.26       | 76.04 ± 31.33 | 2.599   | 0.138   |                                                                                                                                                |
| Non-linear       | SD1                         | 1.34 ± 0.67Θ         | 0.40 ± 0.28   | 24.921  | 0.001   | WT Basal X WT Dual Autonomic Block, WT Basal X TG Basal                                                                                        |
|                  | SD2                         | 2.43 ± 0.82Θ         | 0.82 ± 0.31   | 17.884  | 0.002   | WT Basal X WT Dual Autonomic Block, WT Basal X TG Basal                                                                                        |
|                  | SD1:2 ‡                     | 0.58 ± 0.26          | 0.53 ± 0.30   | 0.293   | 0.600   |                                                                                                                                                |
|                  | MSE (E1)                    | 0.42 ± 0.12*Θ        | 0.08 ± 0.12Θ  | 119.116 | 0.000   | WT Basal X WT Dual Autonomic Block, TG Basal X TG Dual Autonomic Block, WT Basal X TG Basal, WT Dual Autonomic Block X TG Dual Autonomic Block |

| Variable         |                             | Parasympathetic Block |               |         |         |                                                                                                                                                  |
|------------------|-----------------------------|-----------------------|---------------|---------|---------|--------------------------------------------------------------------------------------------------------------------------------------------------|
|                  |                             | WT                    | TG            | F-Value | P-value | Pairwise Interactions                                                                                                                            |
| Time Domain      | SDRR ‡ ‡                    | 1.82 ± 0.83           | 0.68 ± 0.25   | 3.336   | 0.101   |                                                                                                                                                  |
|                  | CV ‡                        | 1.82 ± 0.77           | 0.81 ± 0.27   | 1.028   | 0.337   |                                                                                                                                                  |
|                  | Mean RR                     | 99.38 ± 4.65*Θ        | 84.54 ± 2.70Θ | 10.884  | 0.009   | WT Basal X WT Parasympathetic Block, TG Basal X TG Parasympathetic Block, WT Basal X TG Basal, WT Parsympathetic Block X TG Parsympathetic Block |
|                  | Min RR                      | 94.83 ± 3.57*Θ        | 82.96 ± 2.34  | 5.569   | 0.043   | WT Basal X WT Parasympathetic Block, WT Basal X TG Basal, WT Parsympathetic Block X TG Parsympathetic Block                                      |
|                  | Max RR                      | 103.68 ± 5.94*Θ       | 86.09 ± 3.08Θ | 8.970   | 0.015   | WT Basal X WT Parasympathetic Block, TG Basal X TG Parasympathetic Block, WT Basal X TG Basal, WT Parsympathetic Block X TG Parsympathetic Block |
|                  | Range RR ‡ ‡                | 8.84 ± 3.93           | 3.13 ± 1.04   | 4.129   | 0.073   |                                                                                                                                                  |
| Frequency Domain | VLF (ms <sup>2</sup> /Hz) ‡ | 99.77 ± 41.7*         | 15.53 ± 13.0  | 0.275   | 0.612   |                                                                                                                                                  |
|                  | LF (ms2/Hz)                 | 5.466 ± 1.85*Θ        | 3.79 ± 1.80   | 5.627   | 0.042   | WT Basal X WT Parasympathetic Block, WT Basal X TG Basal                                                                                         |
|                  | HF (ms2/Hz) ‡ ‡             | 13.67 ± 6.44          | 17.26 ± 8.86  | 4.399   | 0.065   |                                                                                                                                                  |
|                  | Total Power (ms2/Hz) ‡ ‡    | 118.91 ± 47.30        | 36.59 ± 15.48 | 2.338   | 0.161   |                                                                                                                                                  |
| Non-linear       | SD1                         | 0.32 ± 0.11Θ          | 0.56 ± 0.25   | 7.367   | 0.024   | WT Basal X WT Parasympathetic Block, WT Basal X TG Basal                                                                                         |
|                  | SD2 ‡ ‡                     | 2.56 ± 1.17           | 0.78 ± 0.28Θ  | 2.035   | 0.187   |                                                                                                                                                  |
|                  | SD1:2 ‡                     | 0.13 ± 0.04           | 0.69 ± 0.24   | 24.527  | 0.001   |                                                                                                                                                  |
|                  | MSE (E1)                    | 0.10 ± 0.06Θ          | 0.15 ± 0.12Θ  | 26.181  | 0.001   | WT Basal X WT Parasympathetic Block, TG Basal X TG Parasympathetic Block, WT Basal X TG Basal                                                    |

| Variable         |                             | Sympathetic Block |               |         |         |                                                                                                                                    |
|------------------|-----------------------------|-------------------|---------------|---------|---------|------------------------------------------------------------------------------------------------------------------------------------|
|                  |                             | WT                | TG            | F-Value | P-value | Pairwise Interactions                                                                                                              |
| Time Domain      | SDRR ‡ ‡                    | 5.77 ± 3.20*      | 2.02 ± 0.25   | 3.820   | 0.066   |                                                                                                                                    |
|                  | CV ‡ ‡                      | 3.97 ± 2.04*      | 2.08 ± 0.27   | 2.971   | 0.102   |                                                                                                                                    |
|                  | Mean RR ‡                   | 140.8 ± 14.6*     | 94.69 ± 2.70  | 0.051   | 0.826   |                                                                                                                                    |
|                  | Min RR                      | 126.56 ± 9.40*Θ   | 89.37 ± 2.34Θ | 25.866  | 0.001   | WT Basal X WT Sympathetic Block, TG Basal X TG Sympathetic Block, WT Basal X TG Basal, WT Sympathetic Block X TG Sympathetic Block |
|                  | Max RR ‡                    | 160.60 ± 31.7*    | 100.53 ± 3.08 | 0.029   | 0.868   |                                                                                                                                    |
|                  | Range RR ‡ ‡                | 34.04 ± 25.92*    | 11.15 ± 1.04  | 0.955   | 0.341   |                                                                                                                                    |
| Frequency Domain | VLF (ms <sup>2</sup> /Hz) ‡ | 96.66 ± 71.3*     | 22.21 ± 13.0  | 0.243   | 0.634   |                                                                                                                                    |
|                  | LF (ms2/Hz) ‡               | 50.49 ± 27.2*     | 10.58 ± 1.80  | 0.042   | 0.839   |                                                                                                                                    |
|                  | HF (ms2/Hz) ‡               | 88.19 ± 54.00*    | 21.19 ± 8.86  | 0.533   | 0.475   |                                                                                                                                    |
|                  | Total Power (ms2/Hz) ‡      | 235.35 ± 144.5*   | 54.00 ± 15.48 | 0.220   | 0.645   |                                                                                                                                    |
| Non-linear       | SD1 ‡ ‡                     | 4.53 ± 3.24*      | 1.19 ± 0.25   | 4.186   | 0.056   |                                                                                                                                    |
|                  | SD2 ‡ ‡                     | 6.66 ± 3.46*      | 2.58 ± 0.28   | 3.647   | 0.072   |                                                                                                                                    |
|                  | SD1:2                       | 0.63 ± 0.28       | 0.51 ± 0.24   | 0.647   | 0.442   |                                                                                                                                    |
|                  | MSE (E1) ‡ ‡                | 1.27 ± 0.69*      | 0.50 ± 0.12   | 3.670   | 0.071   |                                                                                                                                    |

| Variable         |                           | β-Adrenergic Stimulation |                |         |         |                                                                             |
|------------------|---------------------------|--------------------------|----------------|---------|---------|-----------------------------------------------------------------------------|
|                  |                           | WT                       | TG             | F-Value | P-value | Pairwise Interactions                                                       |
| Time Domain      | SDRR ‡ ‡                  | 0.77 ± 0.11              | 0.59 ± 0.12    | 3.352   | 0.082   |                                                                             |
|                  | CV ‡ ‡                    | 0.94 ± 0.16              | 0.75 ± 0.16    | 2.194   | 0.154   |                                                                             |
|                  | Mean RR                   | 82.90 ± 4.42Θ            | 78.48 ± 1.47Θ  | 14.157  | 0.004   | WT Basal X WT β-Adrenergic, TG Basal X TG β-Adrenergic                      |
|                  | Min RR                    | 80.48 ± 5.01Θ            | 76.71 ± 1.70   | 15.433  | 0.001   | WT Basal X WT β-Adrenergic, WT Basal X TG Basal                             |
|                  | Max RR                    | 85.61 ± 4.08Θ            | 80.47 ± 1.25Θ  | 10.683  | 0.008   | WT Basal X WT β-Adrenergic, TG Basal X TG β-Adrenergic, WT Basal X TG Basal |
|                  | Range RR ‡ ‡              | 5.12 ± 2.61              | 3.76 ± 0.82    | 2.694   | 0.116   |                                                                             |
| Frequency Domain | VLF (ms <sup>2</sup> /Hz) | 6.238 ± 7.73*            | 4.271 ± 2.31Θ  | 8.889   | 0.007   | WT Basal X WT β-Adrenergic, WT Basal X TG Basal                             |
|                  | LF (ms2/Hz) ‡             | 3.94 ± 3.61              | 5.34 ± 3.88    | 1.575   | 0.224   |                                                                             |
|                  | HF (ms2/Hz) ‡ ‡           | 8.317 ± 8.93             | 8.059 ± 6.77   | 3.723   | 0.068   |                                                                             |
|                  | Total Power (ms2/Hz)      | 18.50 ± 20.08Θ           | 17.67 ± 12.72Θ | 9.019   | 0.007   | WT Basal X WT β-Adrenergic, TG Basal X TG β-Adrenergic                      |
| Non-linear       | SD1 ‡ ‡                   | 0.63 ± 0.17              | 0.52 ± 0.16    | 2.733   | 0.114   |                                                                             |
|                  | SD2 ‡ ‡                   | 0.89 ± 0.15              | 0.64 ± 0.10    | 3.169   | 0.090   |                                                                             |
|                  | SD1:2                     | 0.72 ± 0.22              | 0.81 ± 0.22    | 0.718   | 0.407   |                                                                             |
|                  | MSE (E1) ‡ ‡              | 0.15 ± 0.06              | 0.08 ± 0.06    | 4.304   | 0.051   |                                                                             |

| Variable         |                           | Basal           |               |
|------------------|---------------------------|-----------------|---------------|
|                  |                           | WT              | TG            |
| Time Domain      | SDRR                      | 10.89 ± 4.17*   | 3.40 ± 4.28   |
|                  | CV                        | 8.05 ± 3.03*    | 3.25 ± 3.46   |
|                  | Mean RR                   | 134.85 ± 9.45*  | 93.49 ± 14.1  |
|                  | Min RR                    | 110.4 ± 8.70*   | 84.88 ± 8.71  |
|                  | Max RR                    | 159.7 ± 13.99*  | 103.15 ± 22.0 |
|                  | Range RR                  | 49.35 ± 15.12*  | 18.27 ± 19.11 |
| Frequency Domain | VLF (ms <sup>2</sup> /Hz) | 11.90 ± 67.4*   | 26.52 ± 31.5  |
|                  | LF (ms2/Hz)               | 54.51 ± 19.7*   | 17.96 ± 22.2  |
|                  | HF (ms2/Hz)               | 81.67 ± 37.01*  | 31.58 ± 24.64 |
|                  | Total Power (ms2/Hz)      | 248.09 ± 67.02* | 76.07 ± 70.78 |
| Non-linear       | SD1                       | 8.53 ± 4.19*    | 2.22 ± 3.19   |
|                  | SD2                       | 12.65 ± 4.64*   | 4.21 ± 5.19   |
|                  | SD1:2                     | 0.66 ± 0.21*    | 0.50 ± 0.17   |
|                  | MSE (E1)                  | 1.98 ± 0.37*    | 0.64 ± 0.62   |

Supplemental Table 2. Top, listing of mean and standard error of the measured HRV parameters. ‡ p<0.05 for main effects genotype differences. ‡ p<0.05 for main effects of drug differences. If a significant interaction effect was found, as determined by a linear mixed effects model with difference of least squares means post hoc test and Satterthwaite's approximation for degrees of freedom, then \* p<0.05 for significant pairwise genotype differences, and Θ p<0.05 for drug differences. F-value and p-value for interactions has been provided for all samples in the table below.

Supplemental Table 3. Analysis of select transcripts within SAN

| Gene  | RQ TG <sup>Ac8</sup> | STE TG <sup>Ac8</sup> | RQ WT | STE WT | P-value | TG <sup>Ac8</sup> /WT |
|-------|----------------------|-----------------------|-------|--------|---------|-----------------------|
| ADRB1 | 0.931                | 0.075                 | 0.984 | 0.041  | 0.582   | 0.946                 |
| ADRB2 | 1.213                | 0.049                 | 1.196 | 0.095  | 0.882   | 1.015                 |
| ADRB3 | 0.855                | 0.121                 | 0.752 | 0.078  | 0.528   | 1.137                 |
| Arrb2 | 1.325                | 0.061                 | 1.047 | 0.052  | 0.005   | 1.266                 |
| Dab2  | 1.326                | 0.073                 | 0.946 | 0.048  | 0.003   | 1.401                 |
| GNAI2 | 0.985                | 0.003                 | 0.998 | 0.009  | 0.259   | 0.987                 |
| GNAI3 | 1.012                | 0.008                 | 1.020 | 0.030  | 0.846   | 0.992                 |
| GNG2  | 0.870                | 0.038                 | 0.996 | 0.041  | 0.046   | 0.874                 |
| GNG5  | 1.025                | 0.047                 | 1.003 | 0.043  | 0.110   | 1.022                 |
| GNAS  | 1.691                | 0.318                 | 1.092 | 0.185  | 0.168   | 1.549                 |
| GRK2  | 1.029                | 0.043                 | 0.983 | 0.037  | 0.473   | 1.047                 |
| GRK5  | 1.955                | 0.181                 | 1.105 | 0.090  | 0.003   | 1.769                 |
| PNMT  | 0.710                | 0.079                 | 1.090 | 0.082  | 0.012   | 0.651                 |
| RGS2  | 0.755                | 0.031                 | 1.166 | 0.069  | 0.001   | 0.648                 |
| RGS6  | 0.866                | 0.095                 | 1.004 | 0.042  | 0.295   | 0.863                 |

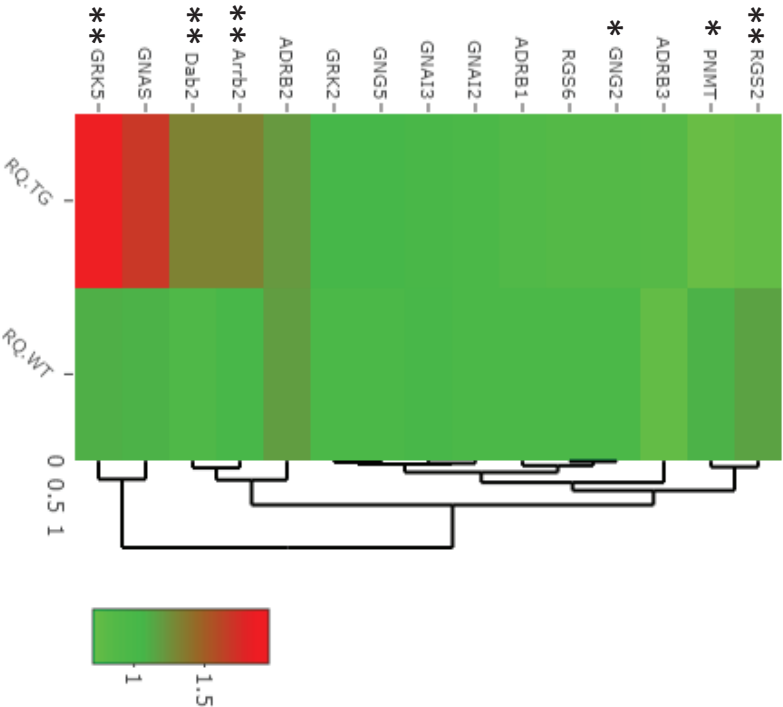

Supplemental Table 3. Abundance of transcripts for selected genes in TG<sup>Ac8</sup> and WT mice determined by RT-qPCR. Mean and STE: and p-value by Student's t-test are presented. The last column shows the ratio of TG<sup>Ac8</sup> to WT. Heat map represents relative quantification (RQ) of each assessed transcript. \*p<0.05, \*\* p<0.01. Note significant upregulation of Arrb2, Dab2, GRK5 and downregulation of RGS2, PNMT, and GNG2 in TG<sup>Ac8</sup> samples.

Supplemental Table 4. List of primers used in this study

| Primer Name | Sequence                  | Amplicon Size |
|-------------|---------------------------|---------------|
| Hs.ADCY8-FW | CTTCGATGAGTTGCTTGGTGAAG   | 110           |
| Hs.ADCY8-RV | ACATTGCTGTTTTTCAGGTGACA   |               |
| Mm.ADCY8-FW | GAAGTGAAGGGAATGGGAATTGT   | 114           |
| Mm.ADCY8-RV | GAAGATCGTGGCGCTGCTA       |               |
| Adrb1-FW    | GCCCACAGATCTATCGAATCATC   | 90            |
| Adrb1-RV    | CTCCCAACTCCTCCTAAACTTTCC  |               |
| Adrb2-FW    | AAGAGCACAAAGCCCTCAAGAC    | 90            |
| Adrb2-RV    | CGTGCACGATATTGACAATGAAG   |               |
| Adrb3-FW    | CTGCGCACCTTAGGTCTCATTAT   | 116           |
| Adrb3-RV    | ATGAAAACCTCCGCTGGGAAGTAG  |               |
| Arrb2-FW    | GGAGCCCCCTTAATGTCAACGT    | 91            |
| Arrb2-RV    | AATGTCGGCGTACTGTCTCACA    |               |
| Dab2-FW     | GGGATTGGCTGGTATCAGTGA     | 81            |
| Dab2-RV     | GCCATTGGTTGTGCTTGTCTTCT   |               |
| Gnai2-RV    | CCAGCTGCTTCTCCCATCTT      | 80            |
| Gnai2-FW    | CAACCCCTCCCCCAAGTCTA      |               |
| Gnai3-FW    | TAAACAGCATTACCTTGGAGAGT   | 93            |
| Gnai3-RV    | GGTTAACCCCGACAAATACAACCTT |               |
| Gng2-FW     | TGGCTGTCCTGGAACCTGTTC     | 92            |
| Gng2-RV     | TGGTGGCTCATGCCTTTATTC     |               |
| Gng5-FW     | GCAGCTGCAGACTTGAAACAGT    | 88            |
| Gng5-RV     | TGAAGGGATTCTGACTTGAAGACA  |               |
| Gnas-FW     | AACATCCGCCGTGTCTTCA       | 83            |
| Gnas-RV     | TTCCCTTCTTAGAGCAGCTCGTATT |               |
| Grk2-FW     | GCCTATGACAGCAGTGCAGACT    | 113           |
| Grk2-RV     | CGGTCAATCTCATGCTTGTCTTT   |               |
| Grk5-FW     | AGAAAGGGCTGTTCCACAGACT    | 88            |
| Grk5-RV     | CGGTGGTTACAACCTGGTCTTAGG  |               |
| Pnmt-FW     | CTCCGGCCCCACCATATATC      | 91            |
| Pnmt-RV     | CTCCTGACGGTTGACTTCCAA     |               |
| Rgs2-FW     | AATCTCCTTTGCCATTAAGTTCCA  | 89            |
| Rgs2-RV     | CAGGCATGGTGGCATCTTCTAT    |               |
| Rgs6-FW     | AGTACCCAGGAAGGGTCTCTTACA  | 111           |
| Rgs6-RV     | ATCCTGTTGGTGAGGTAGTTTGAAC |               |
| Hprt-FW     | CTTCCTCCTCAGACCGCTTTT     | 97            |
| Hprt-RV     | CATAACCTGGTTCATCATCGCTAA  |               |

Supplemental Table 4. Primers and amplicon size for RT-qPCR analyses performed on RNA from SAN tissue.
